# Supplementary material for: Low concentrations of clarithromycin upregulate cellular antioxidant enzymes and phosphorylation of extracellular signal-regulated kinase in human small airway epithelial cells
Source: PubMed Central journal article supplement (PMC6120091; doi:10.1186/s40780-018-0120-4), 2018-09-03
Supplement: 40780_2018_120_MOESM1_ESM.pdf [file 40780_2018_120_MOESM1_ESM.pdf]

□: control, ■: 100  $\mu\text{M}$   $\text{H}_2\text{O}_2$  alone, ▨: 100  $\mu\text{M}$   $\text{H}_2\text{O}_2$  + 1  $\mu\text{M}$  CAM,  
 ▩: 100  $\mu\text{M}$   $\text{H}_2\text{O}_2$  + 5  $\mu\text{M}$  CAM, ▤: 100  $\mu\text{M}$   $\text{H}_2\text{O}_2$  + 10  $\mu\text{M}$  CAM

**a) IL-8**

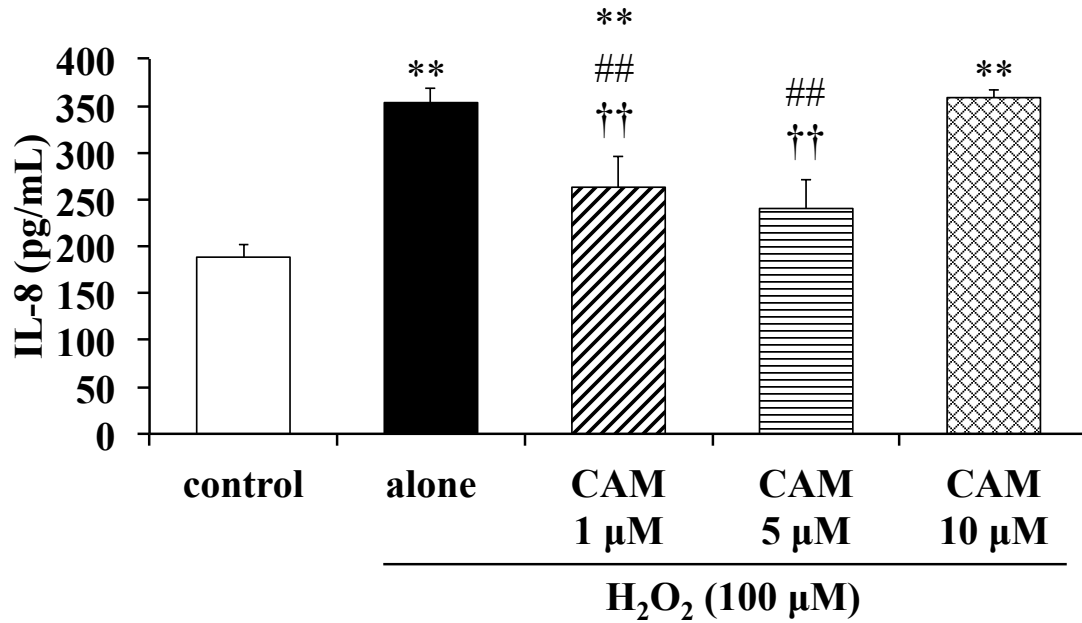

**b) IL-8 mRNA**

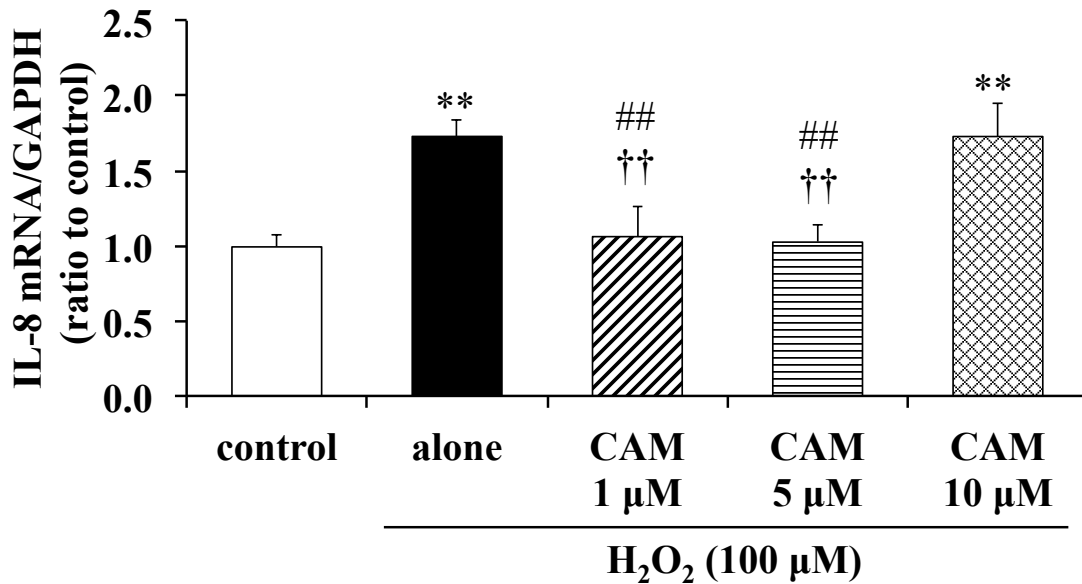

**Additional file 1** Effects of CAM pretreatment on IL-8 protein (a) and mRNA (b) levels in  $\text{H}_2\text{O}_2$ -stimulated SAECS.

In panel **a**, levels of IL-8 protein were measured using the ELISA method. In panel **b**, IL-8 mRNA expression was measured using real-time RT-PCR. Samples were obtained from supernatants (**a**) or cDNA (**b**) of control cells, of cells stimulated with 100  $\mu\text{M}$   $\text{H}_2\text{O}_2$  alone, or of cells pretreated with 1  $\mu\text{M}$ , 5  $\mu\text{M}$  or 10 $\mu\text{M}$  CAM 72 h before stimulation with 100  $\mu\text{M}$   $\text{H}_2\text{O}_2$  for 4 or 1 h, respectively. Data are presented as means  $\pm$  SD of three independent experiments. \* $p$ <0.05, \*\* $p$ <0.01 vs. control cells, ### $p$ <0.01 vs. cells stimulated with  $\text{H}_2\text{O}_2$  alone, †† $p$ <0.01 vs. cells pretreated with 10  $\mu\text{M}$  CAM
