# Supplementary material for: Low concentrations of clarithromycin upregulate cellular antioxidant enzymes and phosphorylation of extracellular signal-regulated kinase in human small airway epithelial cells
Source: PubMed Central journal article supplement (PMC6120091; doi:10.1186/s40780-018-0120-4), 2018-09-03
Supplement: 40780_2018_120_MOESM4_ESM.pdf [file 40780_2018_120_MOESM4_ESM.pdf]

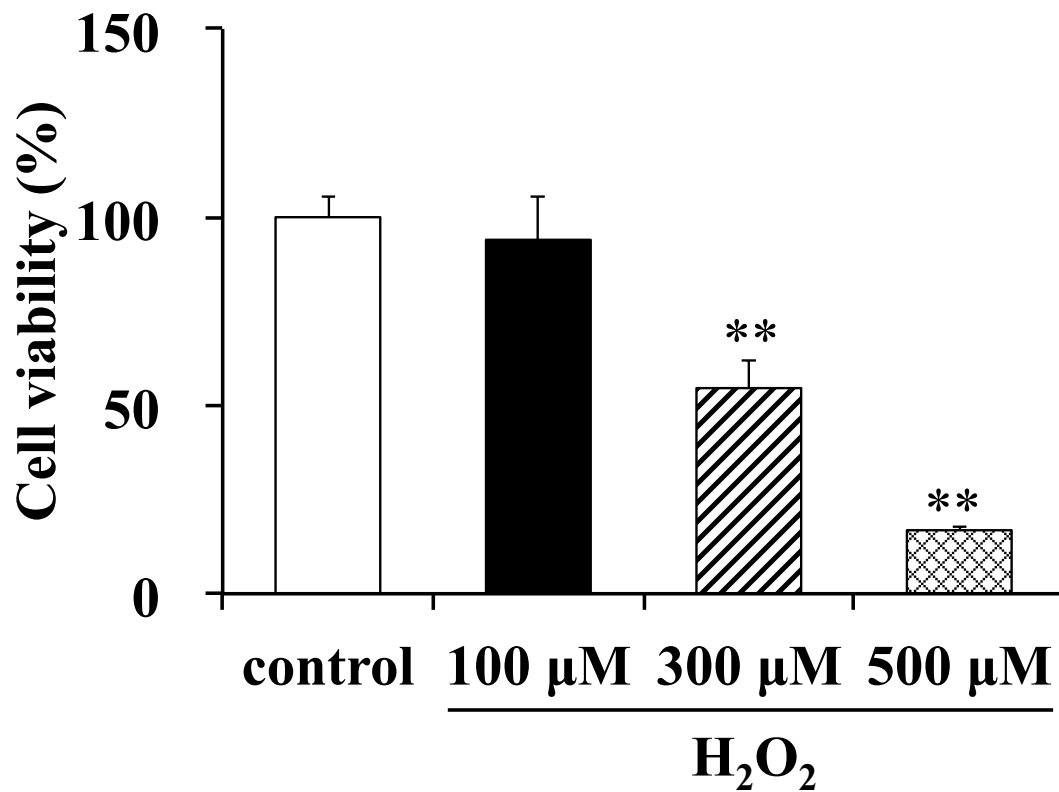

**Additional file 4** Effects of H<sub>2</sub>O<sub>2</sub> on cell viability in SAECs.

Cells were incubated with 100 μM, 300 μM or 500 μM H<sub>2</sub>O<sub>2</sub> for 6 h. Cell viability was assessed by measuring formazan production from viable cells (at 450 nm) as described in the Materials and Methods. Data are presented as means ± SD of three independent experiments. \*\*p < 0.01 vs. control cells
