# Supplementary material for: Low concentrations of clarithromycin upregulate cellular antioxidant enzymes and phosphorylation of extracellular signal-regulated kinase in human small airway epithelial cells
Source: PubMed Central journal article supplement (PMC6120091; doi:10.1186/s40780-018-0120-4), 2018-09-03
Supplement: 40780_2018_120_MOESM5_ESM.pdf [file 40780_2018_120_MOESM5_ESM.pdf]

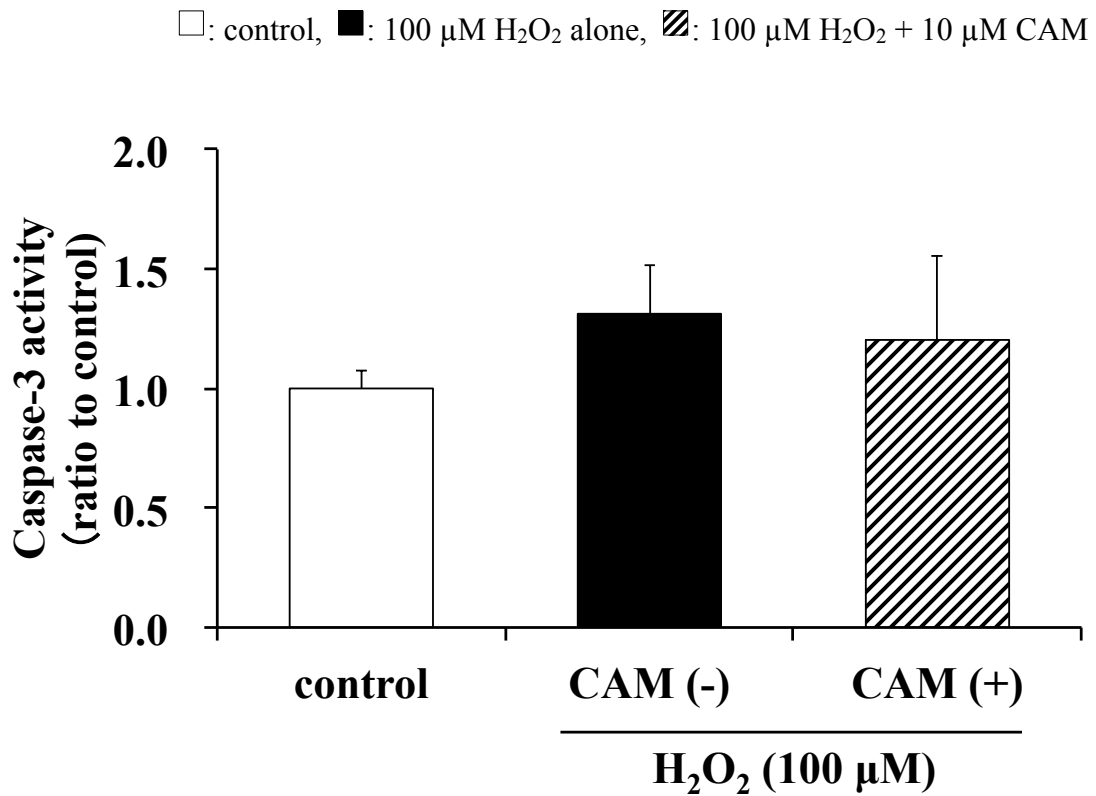

**Additional file 5** Caspase-3 activation induced by  $\text{H}_2\text{O}_2$  after CAM pretreatment in SAECs.

The activation of caspase-3 was analyzed by using anti-caspase-3 and by flow cytometry. Samples were obtained from control cells, or from cells pretreated with or without 10  $\mu\text{M}$  CAM for 72 h before stimulation with 100  $\mu\text{M}$   $\text{H}_2\text{O}_2$  for 3 h. Relative fluorescence of control cells was set to 1.0. Data are presented as means  $\pm$  SD of three independent experiments.
