# Supplementary material for: Low concentrations of clarithromycin upregulate cellular antioxidant enzymes and phosphorylation of extracellular signal-regulated kinase in human small airway epithelial cells
Source: J Pharm Health Care Sci. 2018 Sep 3;4:23. doi: 10.1186/s40780-018-0120-4 (PMC6120091; doi:10.1186/s40780-018-0120-4)
Supplement: Supplementary file 2 — Effects of CAM on cell viability in SAECs stimulated with H2O2. (PDF 82 kb) [file 40780_2018_120_MOESM2_ESM.pdf]

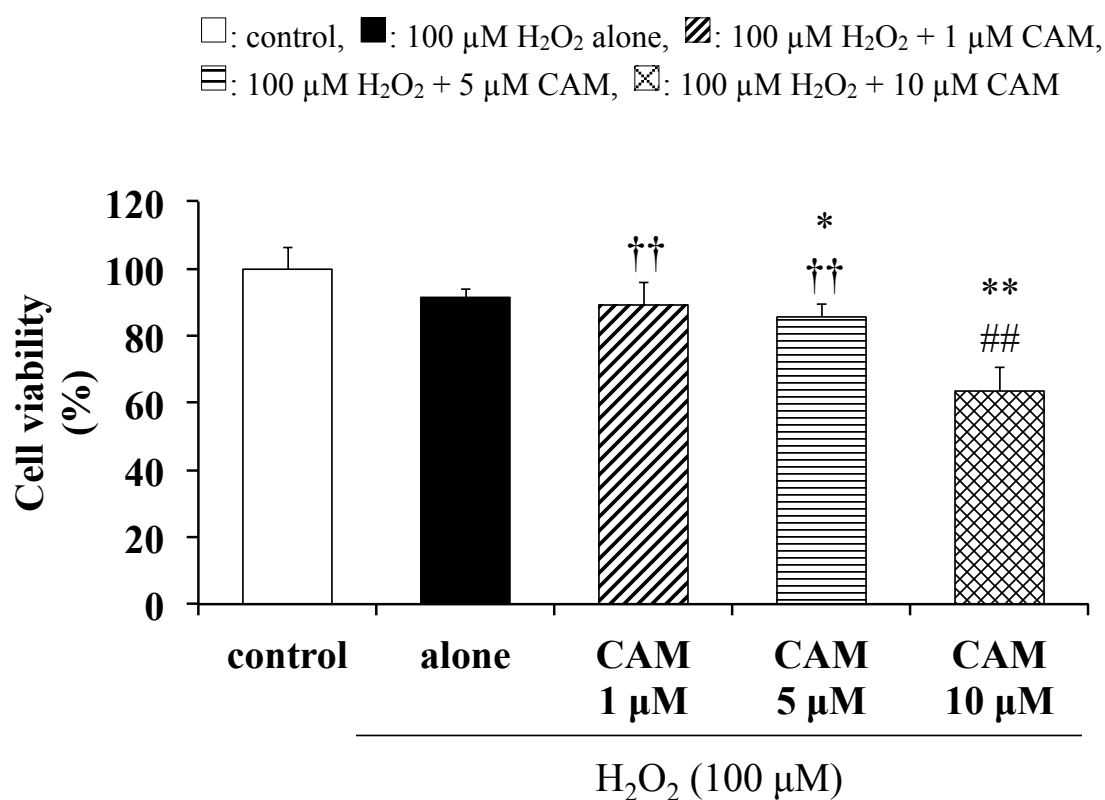

**Additional file 2** Effects of CAM on cell viability in SAECs stimulated with H<sub>2</sub>O<sub>2</sub>.

Samples were obtained from control cells, from cells stimulated with 100  $\mu$ M H<sub>2</sub>O<sub>2</sub> alone, or from cells pretreated with 1  $\mu$ M, 5  $\mu$ M, and 10  $\mu$ M CAM for 72 h before stimulation with 100  $\mu$ M H<sub>2</sub>O<sub>2</sub> for 3 h. Data are presented as means  $\pm$  SD of six independent experiments. \*p<0.05, \*\*p<0.01 vs. control cells, ##p<0.01 vs. cells stimulated with H<sub>2</sub>O<sub>2</sub> alone, ††p<0.01 vs. cells pretreated with 10  $\mu$ M CAM.
